# Supplementary material for: Facile synthesis of organo-soluble surface-grafted all-single-layer graphene oxide as hole-injecting buffer material in organic light-emitting diodes
Source: Royal Society of Chemistry journal article supplement (doi:10.1039/c1jm00044f), 2011-01-01
Supplement: c1jm00044f.pdf [file c1jm00044f.pdf]

**Supplementary Material for Journal of Materials Chemistry**

**This journal is © The Owner Societies 2011**

Supplementary material (ESI) for Journal of Materials Chemistry

This journal is © The Royal Society of chemistry 2011

**Facile synthesis of high-soluble surface-grafted all-single-layer graphene oxide as hole-injecting buffer material in organic light-emitting diodes**

**Ze Zhong, Yanfeng Dai, Dongge Ma, and Zhi Yuan Wang\***

*State Key Laboratory of Polymer Physics and Chemistry, Changchun Institute of Applied Chemistry, Chinese Academy of Sciences and Graduate School of Chinese Academy of Sciences, Changchun, 130022, China. Fax: +86-431-852901; Tel: +86-431-85262901*

\* E-mail: wayne\_wang@carleton.ca

Supplementary information

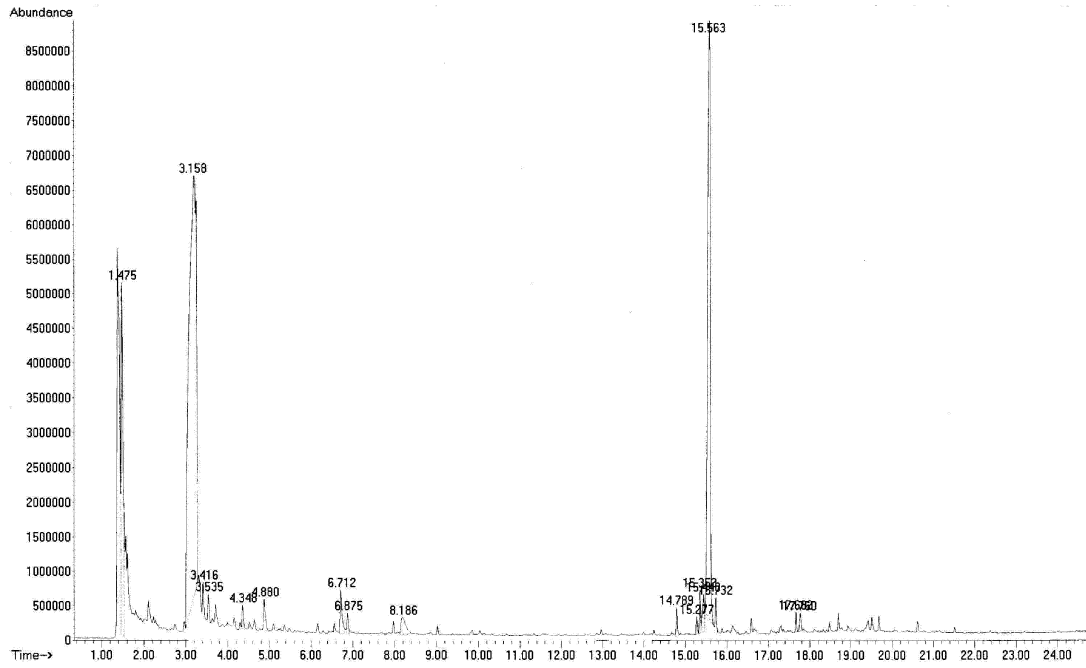

Unknown: Scan 1429 (15.570 min): Y-1-2010-9.2.D\data.ms (-1420)  
Compound in Library Factor = 522

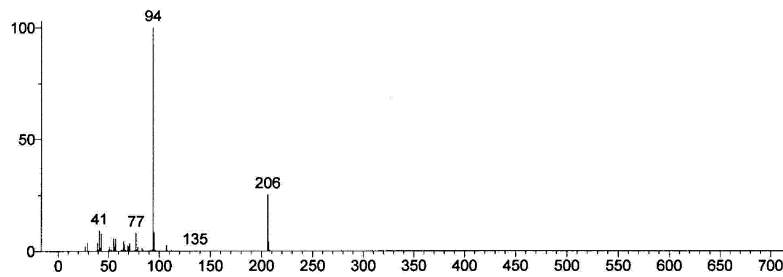

Hit 1 : Benzene, (octyloxy)-  
C<sub>14</sub>H<sub>22</sub>O; MF: 966; RMF: 967; CAS: 1818-07-1; Lib: mainlib; ID: 52623.

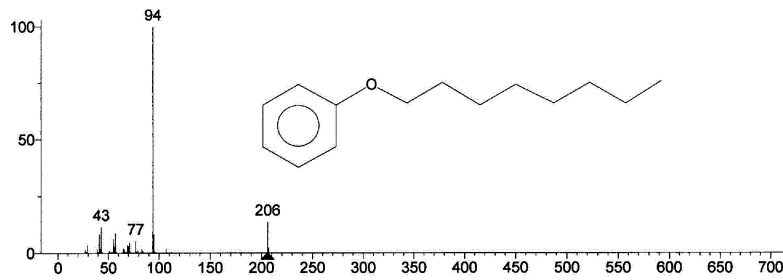

Hit 2 : Benzene, (octyloxy)-  
C<sub>14</sub>H<sub>22</sub>O; MF: 927; RMF: 929; CAS: 1818-07-1; Lib: replib; ID: 12175.

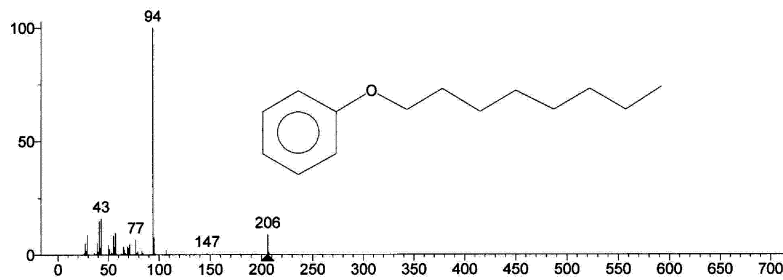

| peak # | R.T. min | first scan | max scan | last scan | PK TY | peak height | corr. area | corr. % max. | % of total |
|--------|----------|------------|----------|-----------|-------|-------------|------------|--------------|------------|
| 1      | 1.475    | 127        | 129      | 134       | rM 2  | 5088481     | 15547188   | 20.87%       | 10.906%    |
| 2      | 3.156    | 269        | 284      | 297       | rBB2  | 6045535     | 74486033   | 100.00%      | 52.250%    |
| 3      | 3.416    | 305        | 308      | 313       | rM    | 493537      | 985856     | 1.32%        | 0.692%     |
| 4      | 3.535    | 316        | 319      | 325       | rM 2  | 407464      | 841487     | 1.13%        | 0.590%     |
| 5      | 4.348    | 393        | 394      | 401       | rM    | 343693      | 699492     | 0.94%        | 0.491%     |
| 6      | 4.880    | 436        | 443      | 456       | rM 2  | 453656      | 1371246    | 1.84%        | 0.962%     |
| 7      | 6.712    | 609        | 612      | 621       | rM    | 629234      | 2015203    | 2.71%        | 1.414%     |
| 8      | 6.875    | 624        | 627      | 631       | rM    | 297787      | 674182     | 0.91%        | 0.473%     |
| 9      | 8.186    | 743        | 748      | 765       | rM 3  | 243284      | 1942223    | 2.61%        | 1.362%     |
| 10     | 14.789   | 1353       | 1357     | 1364      | rM    | 411317      | 836326     | 1.12%        | 0.587%     |
| 11     | 15.277   | 1397       | 1402     | 1405      | rM    | 252401      | 501188     | 0.67%        | 0.352%     |
| 12     | 15.353   | 1406       | 1409     | 1411      | rM    | 625444      | 1212725    | 1.63%        | 0.851%     |
| 13     | 15.440   | 1411       | 1417     | 1419      | rM 2  | 537373      | 1770600    | 2.38%        | 1.242%     |
| 14     | 15.559   | 1420       | 1428     | 1440      | rBB   | 8643382     | 37521840   | 50.37%       | 26.320%    |
| 15     | 15.732   | 1441       | 1444     | 1447      | rM    | 512597      | 983799     | 1.32%        | 0.690%     |
| 16     | 17.662   | 1619       | 1622     | 1625      | rM    | 289622      | 496113     | 0.67%        | 0.348%     |
| 17     | 17.760   | 1628       | 1631     | 1638      | rM 2  | 261041      | 672117     | 0.90%        | 0.471%     |

Sum of corrected areas: 142557618

Figure S1. Pyrolysis-GC/MS of P-GO (sample B)

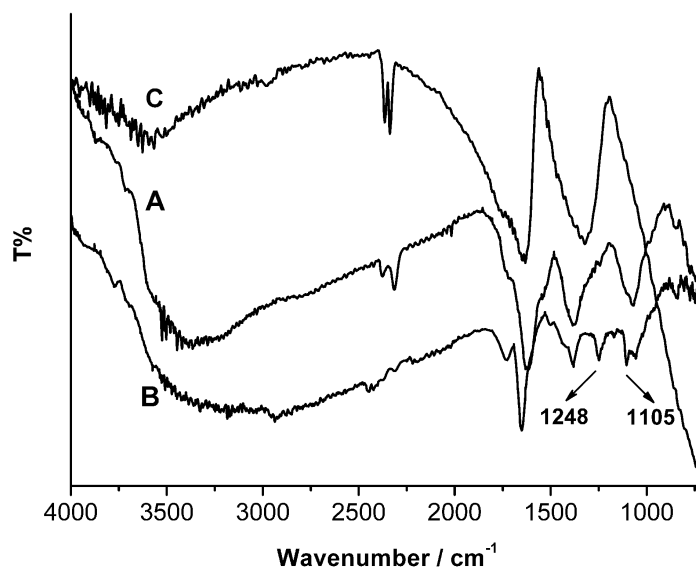

Figure S2. IR spectra of (A) graphite oxide, (B) P-GO (sample B) and (C) chemically reduced P-GO

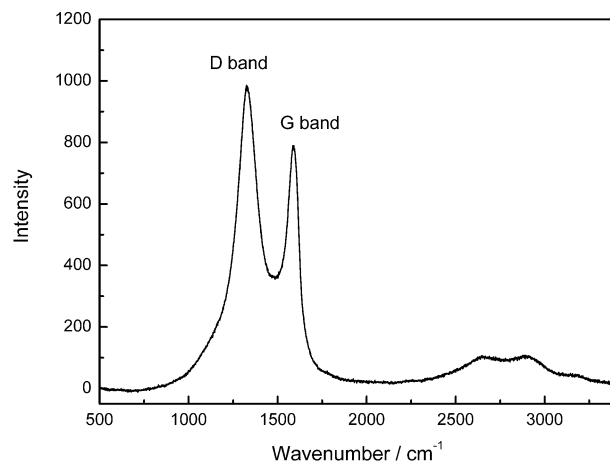

**Figure S3.** Raman spectrum (633 nm laser excitation) of P-GO (sample B; powder)

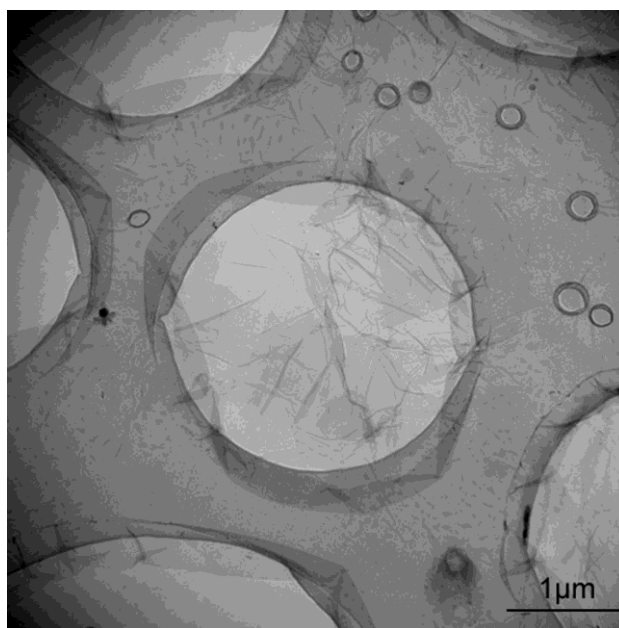

**Figure S4.** TEM image of P-GO sheets on lacey support film

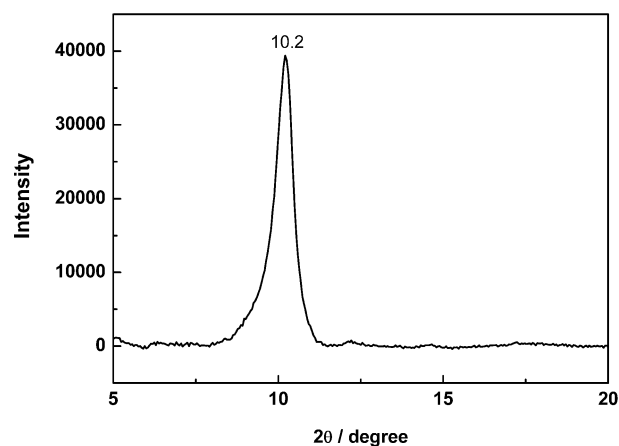

**Figure S5.** XRD spectrum of graphite oxide

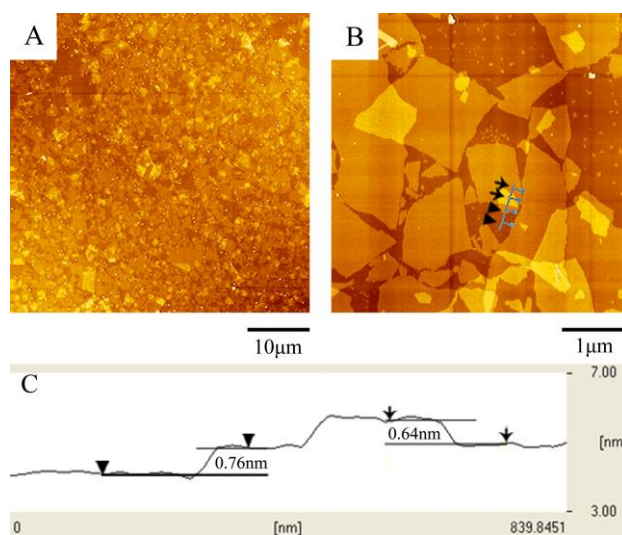

**Figure S6.** AFM images of chemically reduced graphene on freshly cleaved mica. A)  $20 \times 20 \mu\text{m}$ . B)  $5 \times 5 \mu\text{m}$ . C) Height profile of GO sheets in B)

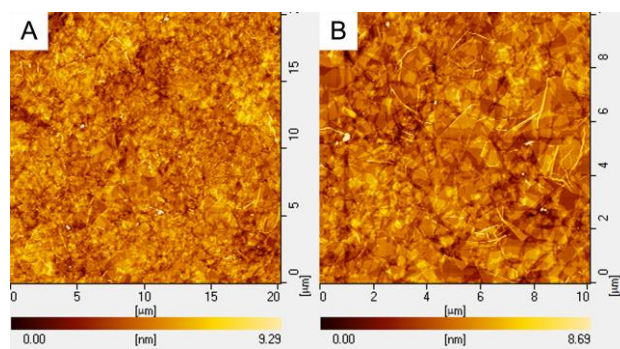

**Figure S7.** AFM images of P-GO (sample C) films spin-coated on freshly cleaved mica. (A)  $20 \times 20 \mu\text{m}$ . (B)  $10 \times 10 \mu\text{m}$ .
